# Supplementary material for: High lymphatic vessel density and presence of lymphovascular invasion both predict poor prognosis in breast cancer
Source: Springer Nature journal article supplement (doi:10.1186/s12885-017-3338-x), 2017-05-17
Supplement: MOESM1 [file 12295074]

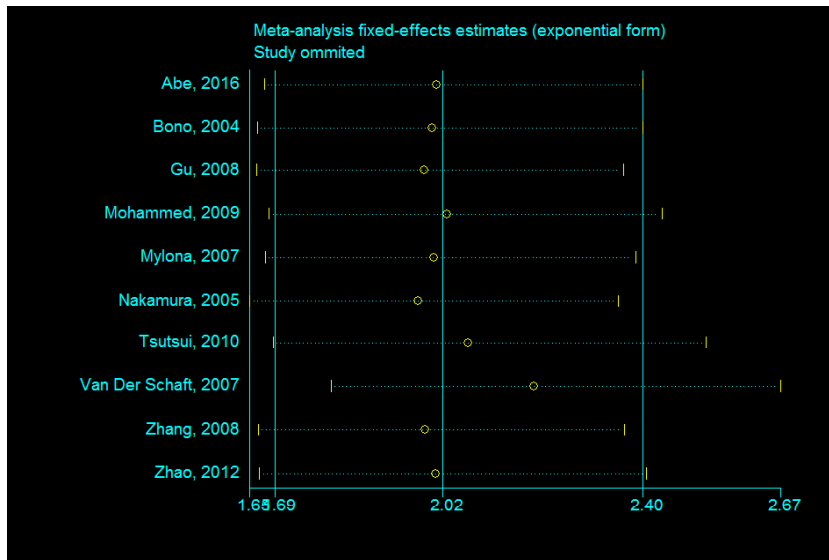

A

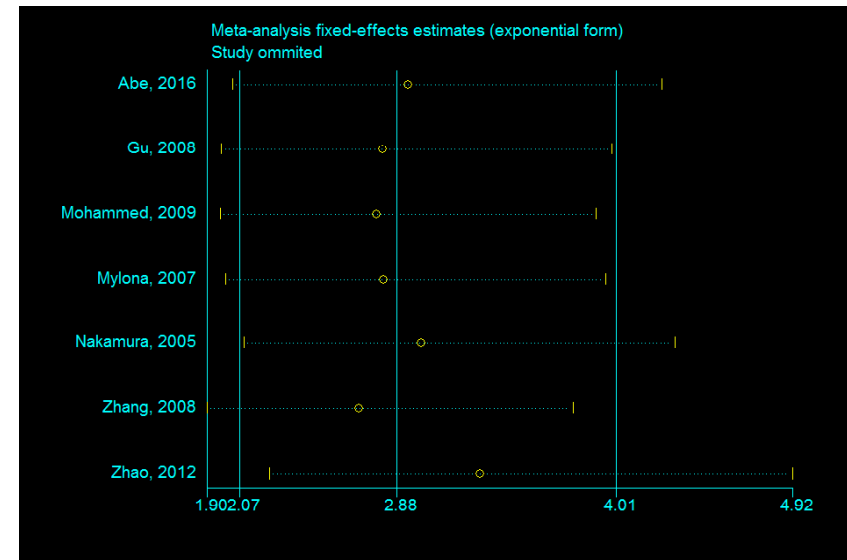

B

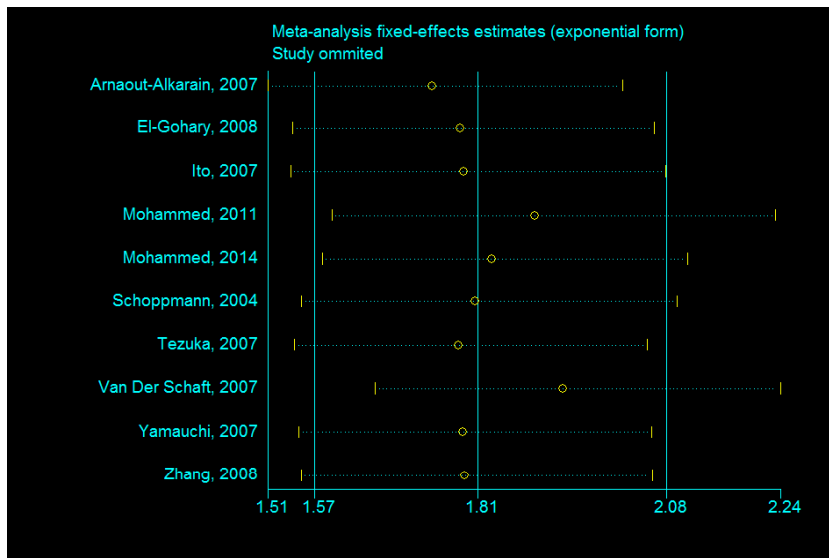

C

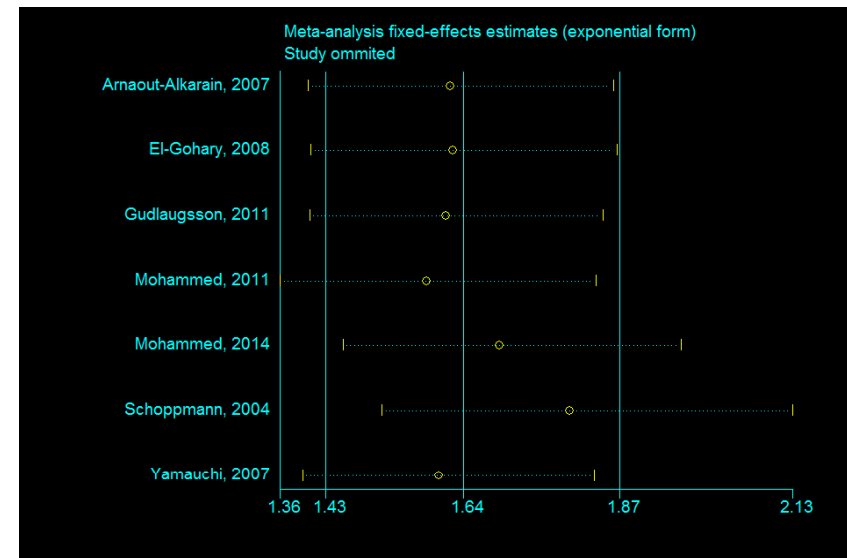

D

**Figure S1:** Sensitivity analysis of the included studies reporting the prognostic values of lymphatic vessel density and lymphovascular invasion.

**A.** Lymphatic vessel density with disease-free survival; **B.** lymphatic vessel density with overall survival; **C.** lymphovascular invasion with disease-free survival; **D.** lymphovascular invasion with overall survival.

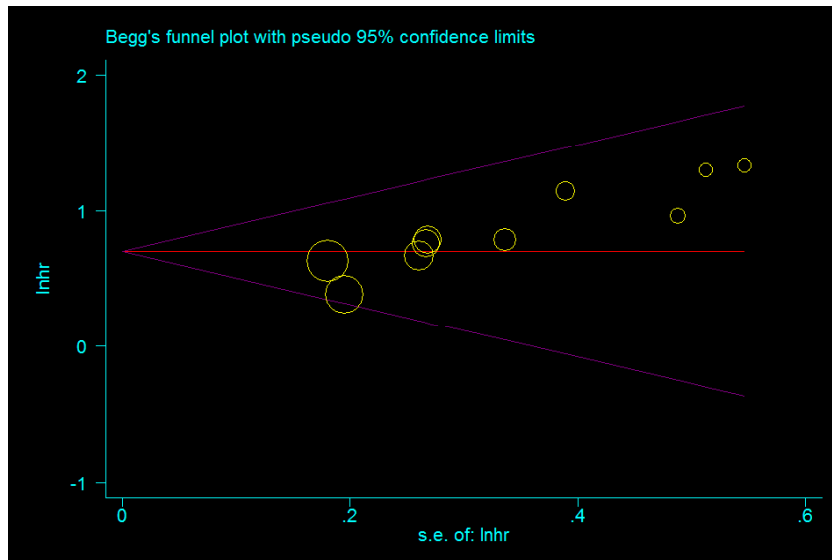

**A**

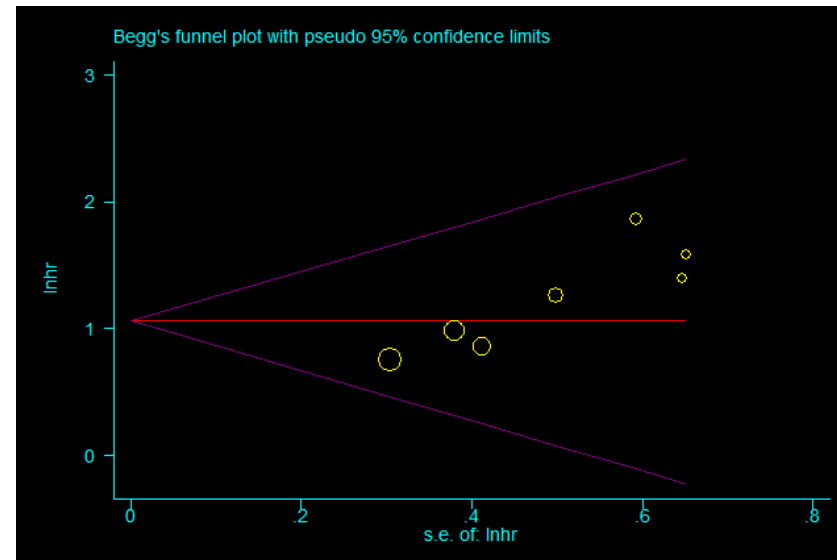

**B**

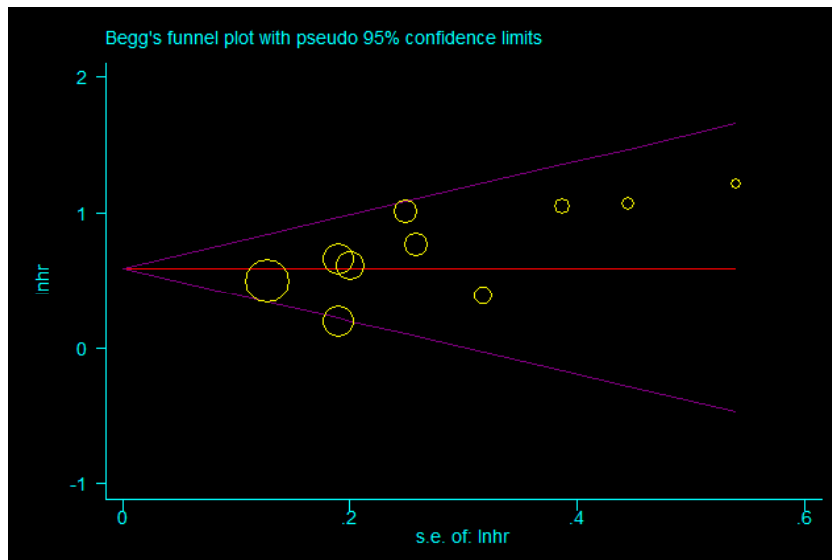

**C**

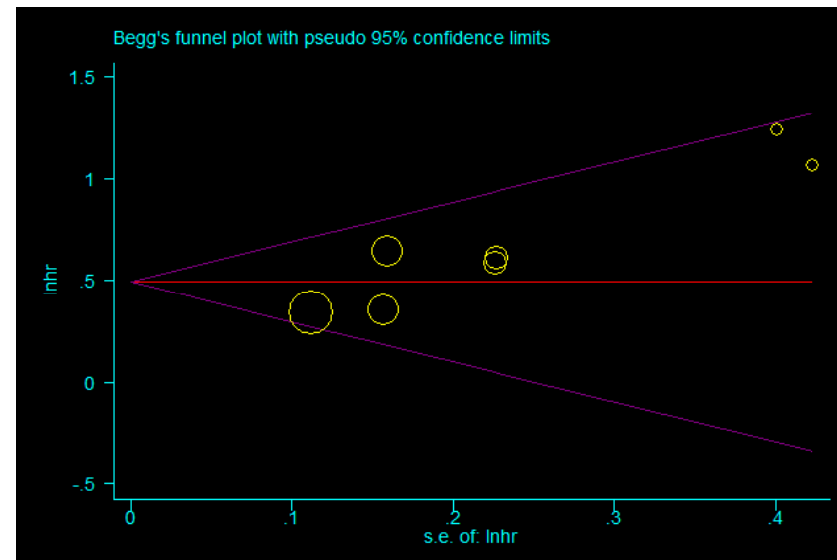

**D**

**Figure S2:** Begg's funnel plot of the included studies reporting the prognostic values of lymphatic vessel density and lymphovascular invasion.

**A.** lymphatic vessel density with disease-free survival; **B.** lymphatic vessel density with overall survival; **C.** lymphovascular invasion with disease-free survival; **D.** lymphovascular invasion with overall survival.
